# Supplementary material
Source: PubMed Central journal article supplement (PMC1304172)
Supplement: biophysj_86_5_3060__1.pdf [file biophysj_86_5_3060__1.pdf]

**Low-resolution reconstruction of a synthetic DNA Holliday junction -**

**Nöllmann, M., Byron, O. and Stark, M.**

**Supplementary material**

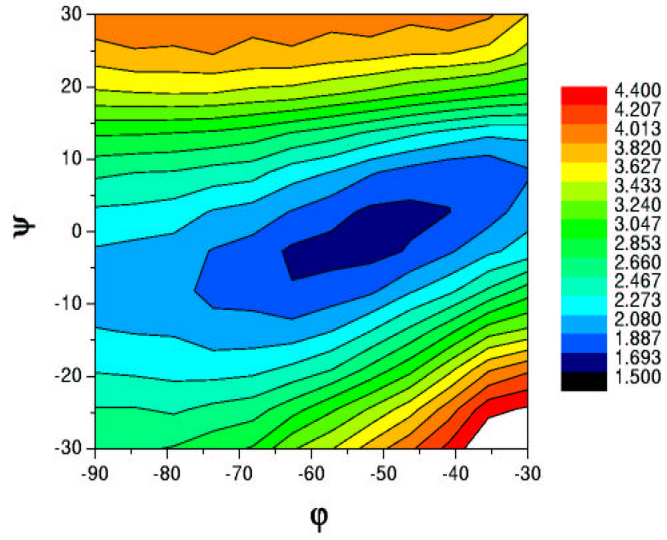

Figure 1: Contour plot of  $\Xi$  as a function of the angles  $\psi$  and  $\varphi$  for the 10 mM  $\text{Mg}^{2+}$  sample data analysed with the stacked model, with the distance between arms fixed at  $d = 17.5 \text{ \AA}$ .

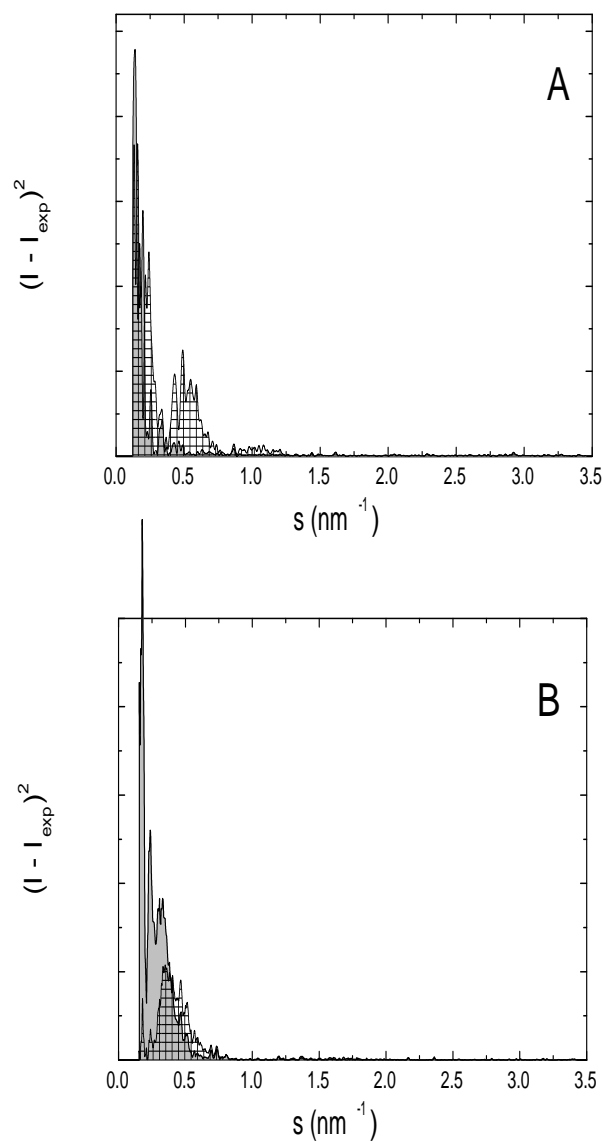

Figure 2: (A) The square of the difference between the experimental data for the 0 mM  $\text{Mg}^{2+}$  sample and the best fits obtained by using the square planar (*grey shadowing*) and the stacked (*grid pattern*) models. The square planar model shows a smaller integral, and thus fits the experimental data better than the stacked model. (B) The square of the difference between the experimental data for the 10 mM  $\text{Mg}^{2+}$  sample and the best fits obtained by using the square planar (*grey shadowing*) and the stacked (*grid pattern*) models. The square planar model displays now a larger integral, and thus the stacked model produces a better fit to the 10 mM  $\text{Mg}^{2+}$  sample experimental data.
